# Supplementary material for: High solubility crystalline hydrates of Na and K furosemide salts
Source: Royal Society of Chemistry journal article supplement (doi:10.1039/c3ce42347f), 2014-01-01
Supplement: c3ce42347f1.pdf [file c3ce42347f1.pdf]

## High solubility crystalline hydrates of Na and K Furosemide salts†

U. B. Rao Khandavilli,<sup>a</sup> Swarupa Gangavaram,<sup>a</sup> N. Rajesh Goud,<sup>b</sup> Suryanarayan Cherukuvada,<sup>b</sup> S. Raghavender,<sup>a</sup> Ashwini Nangia,<sup>a,b,\*</sup> Sulur G. Manjunatha,<sup>c</sup> Sudhir Nambiar,<sup>c</sup> and Sharmistha Pal,<sup>c,\*</sup>

<sup>a</sup> Technology Business Incubator, University of Hyderabad, Prof. C. R. Rao Road, Central University PO, Gachibowli, Hyderabad 500 046, India

<sup>b</sup> School of Chemistry, University of Hyderabad, Prof. C. R. Rao Road, Central University PO, Gachibowli, Hyderabad 500 046, India

<sup>c</sup> Pharmaceutical Development, AstraZeneca India Pvt. Ltd., Bellary Road, Hebbal, Bangalore 560 024, India

E-mail: [ashwini.nangia@gmail.com](mailto:ashwini.nangia@gmail.com), [sharmistha.pal@astrazeneca.com](mailto:sharmistha.pal@astrazeneca.com)

## Electronic Supplementary Information†

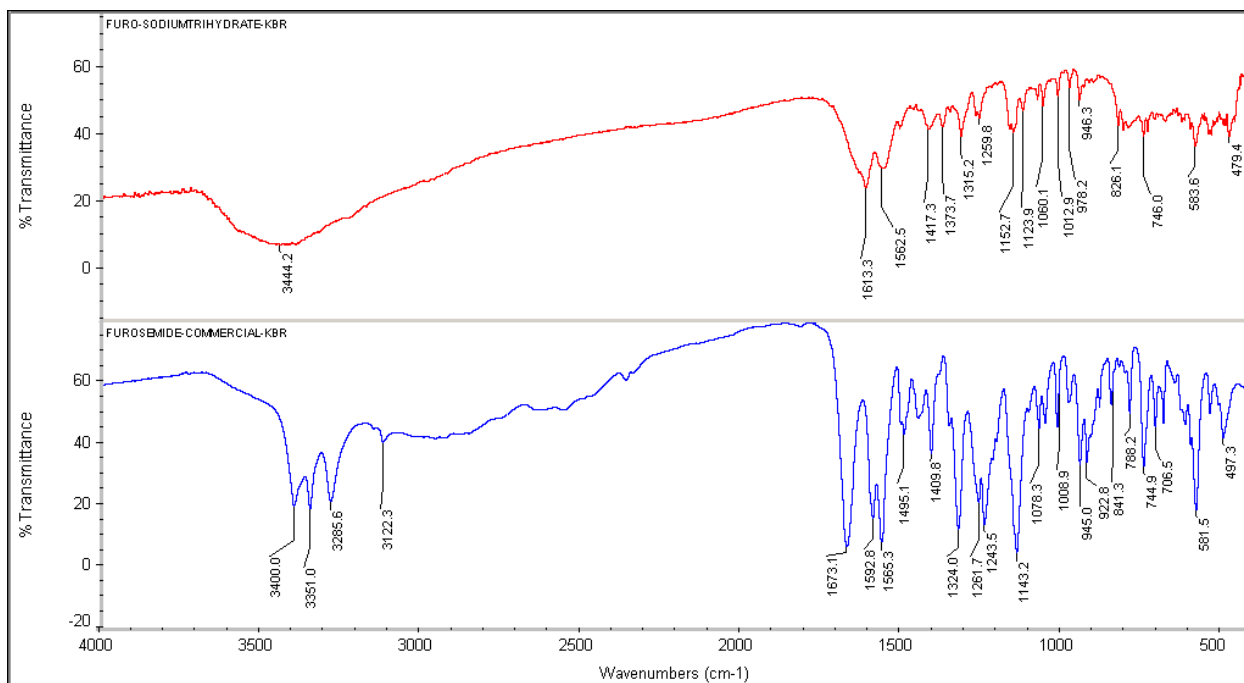

Fig. S1 IR spectrum of furo-Na-trihydrate and furosemide.

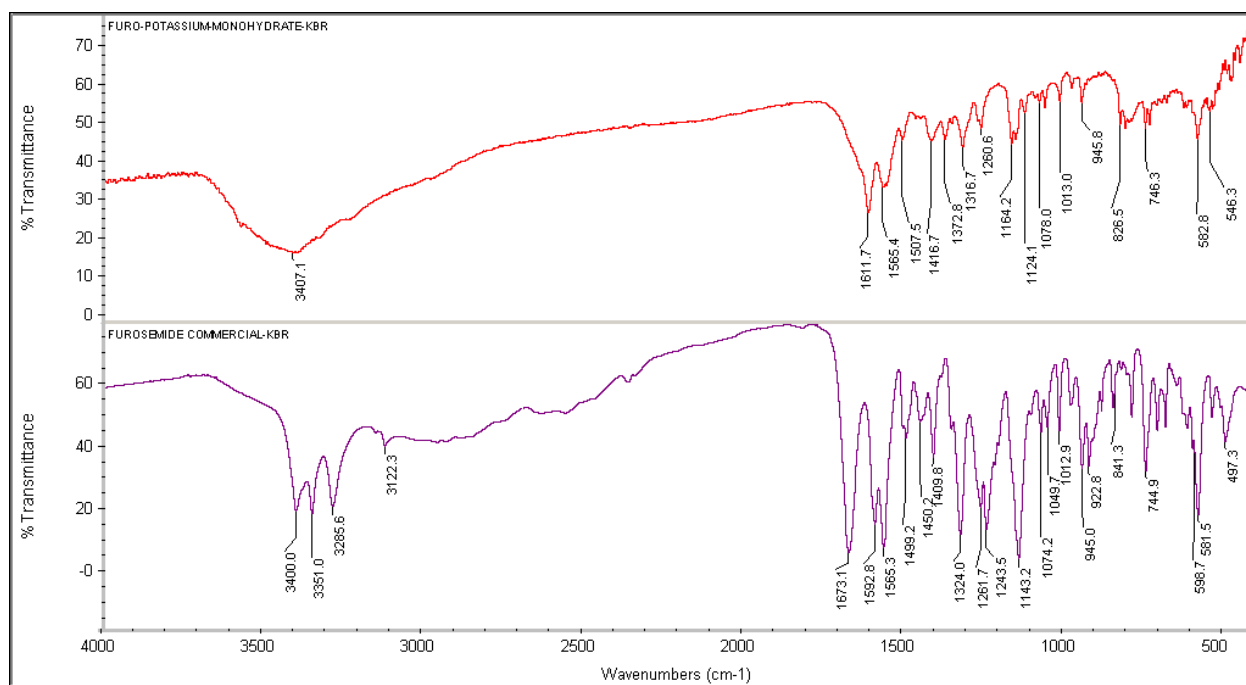

Fig. S2 IR spectrum of furo-K-monohydrate and furosemide.

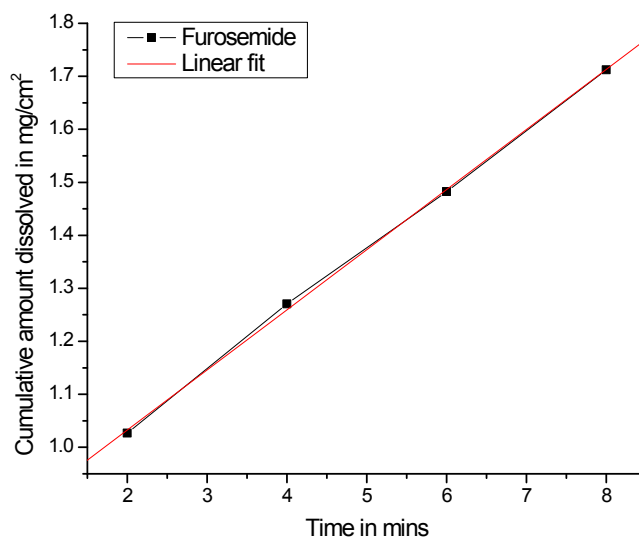

(a)

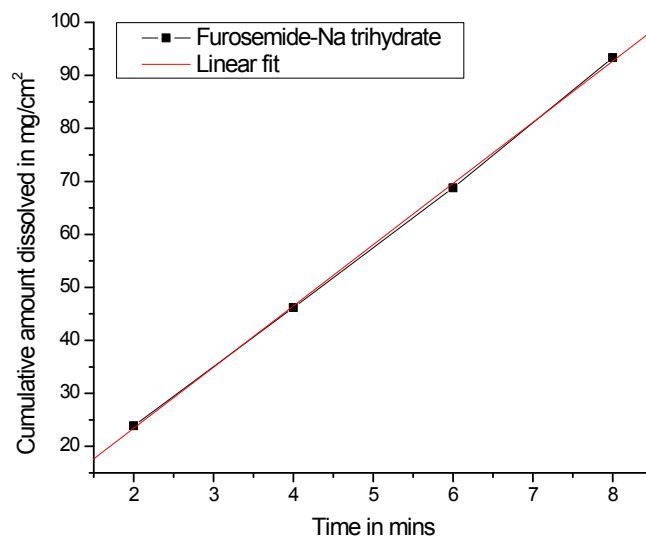

(b)

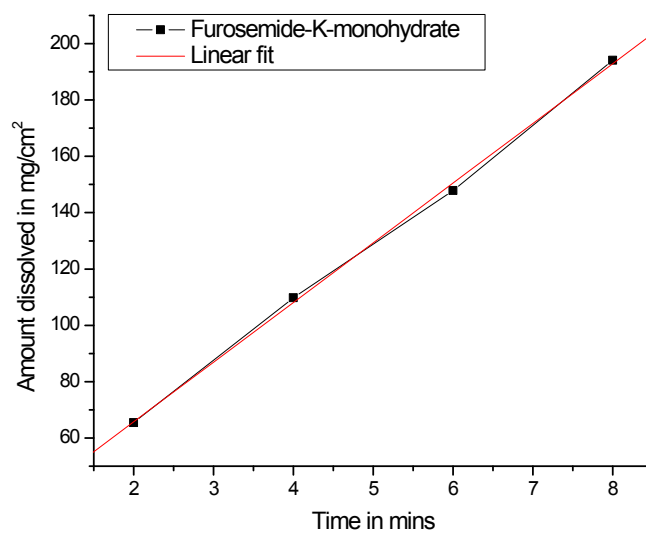

(c)

**Fig. S3** Linear fit dissolution data points used to calculate IDR of (a) furosemide, (b) Furosemide-Na-trihydrate and (c) Furosemide-K-monohydrate.

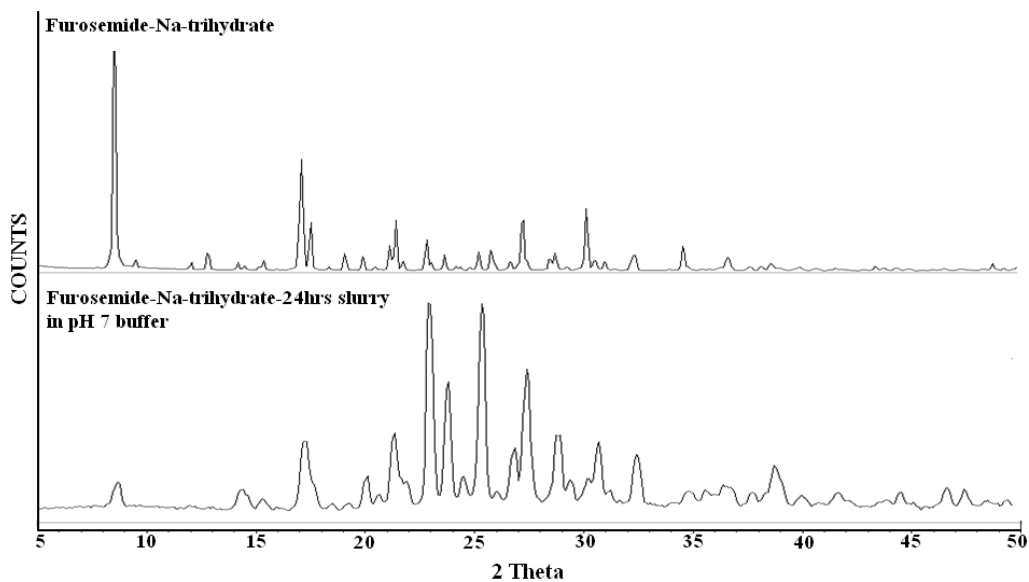

(a)

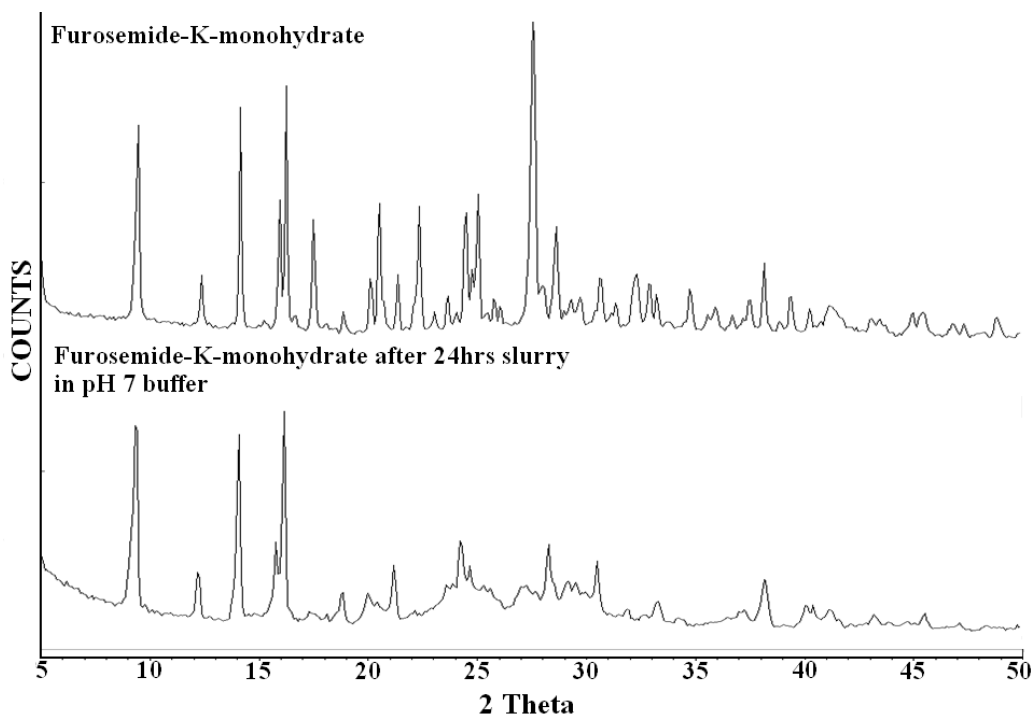

(b)

**Fig. S4** PXRDs of furosemide salts before and after intrinsic dissolution/equilibrium solubility experiment: (a) Furo-Na-trihydrate, (b) Furo-K-monohydrate. Both salts were stable in the aqueous slurry conditions.

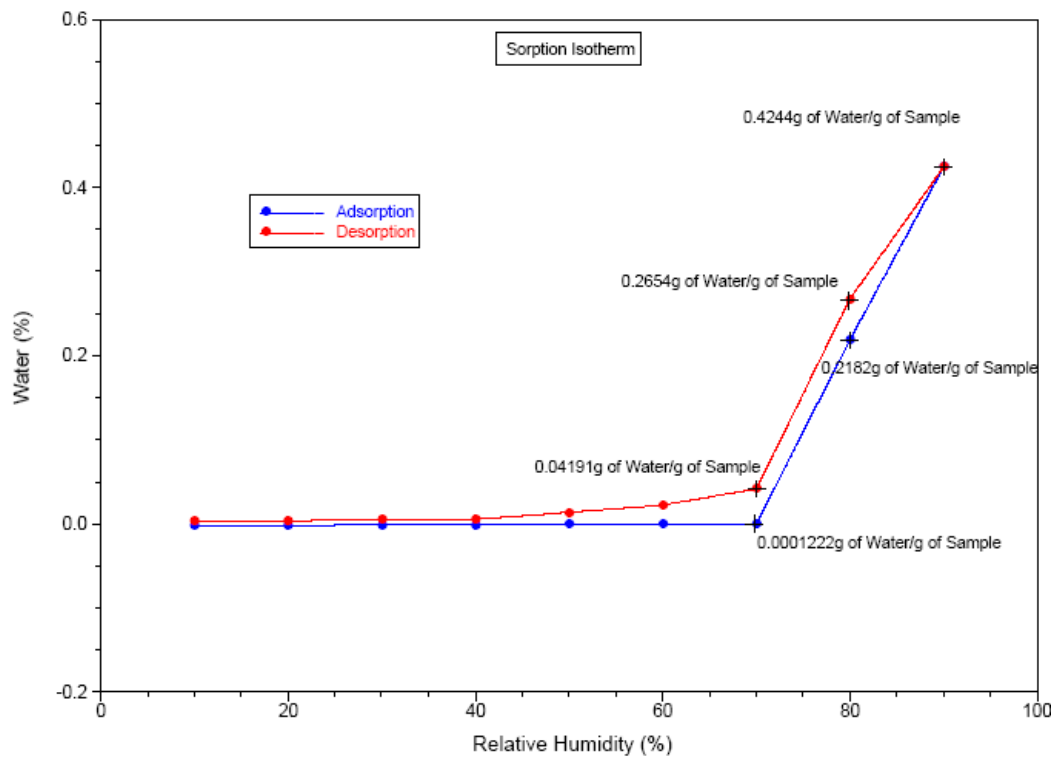

(a)

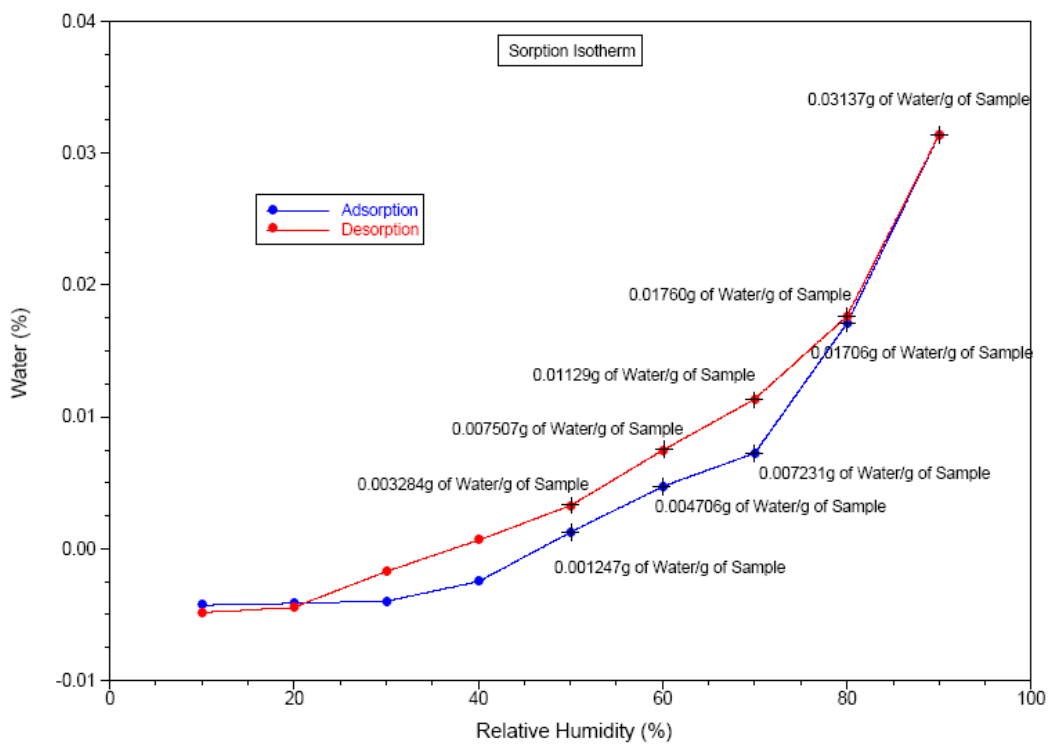

(b)

**Fig. S5** (a) Furo-Na-trihydrate showed water uptake of 42.4% at 90% RH and upon desorption did not retain any water in the crystalline lattice. (b) Furo-K-monohydrate showed water uptake of 3.1% at 90% RH and upon desorption did not retain any water in the crystal lattice.

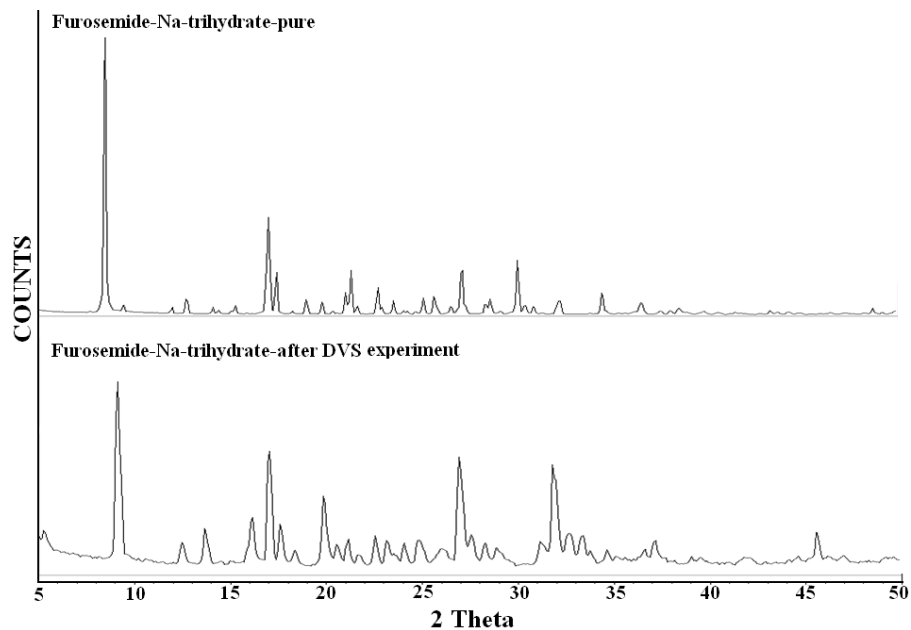

(a)

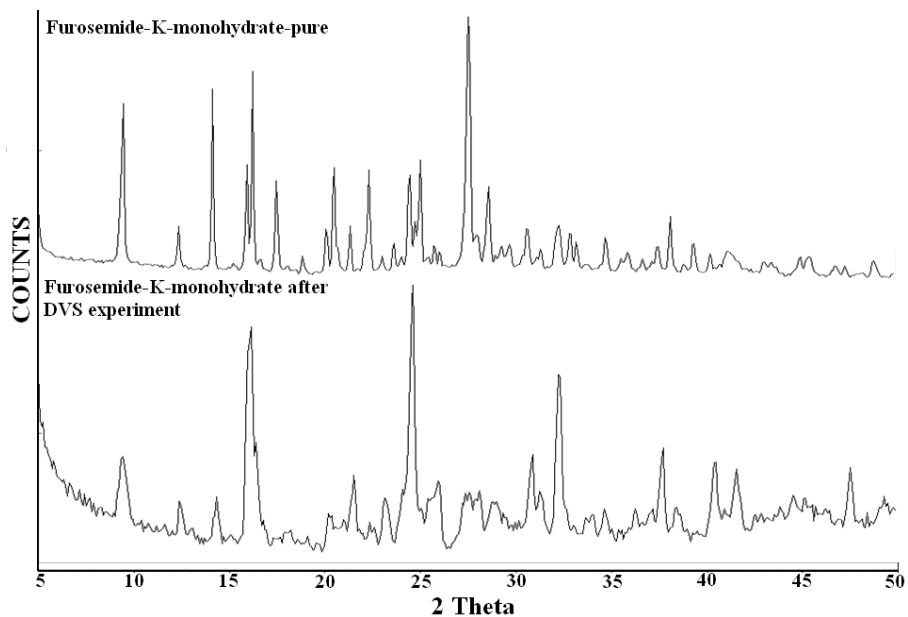

(b)

**Fig. S6** PXRD of (a) Furo-Na-trihydrate and (b) Furo-K-monohydrate at the end of DVS experiment. There appears to be no phase change but an overall broadening of peaks is observed after exposure to high humidity and temperature for about 4 h (sample size is 4-5 mg for the post-DVS plot).
